# Supplementary material for: Crystal Structure of Cruxrhodopsin-3 from Haloarcula vallismortis
Source: PubMed Central journal article supplement (PMC4182453; doi:10.1371/journal.pone.0108362), 2014-09-30
Supplement: pone.0108362.s001.pdf [file pone.0108362.s001.pdf]

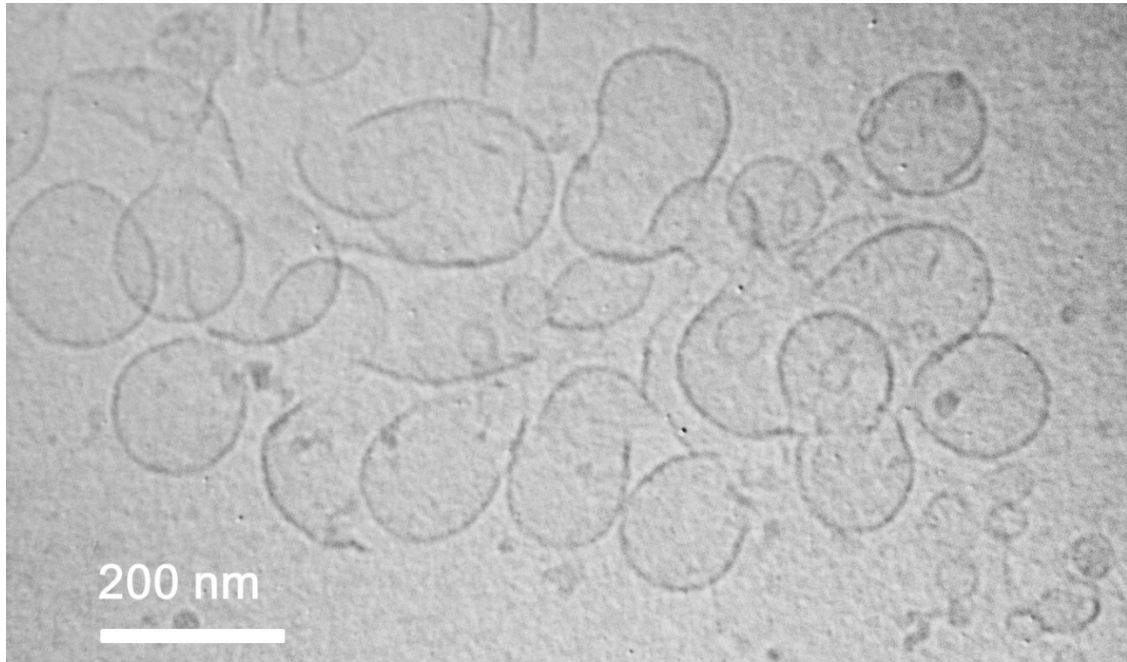

**Figure S1. Cryo-electron micrograph of cR3-rich claret membrane.** An aqueous suspension of cR3-rich claret membrane mounted on a carbon-coated grid was flash-cooled with liquid propane.
