# Supplementary material for: Crystal Structure of Cruxrhodopsin-3 from Haloarcula vallismortis
Source: PubMed Central journal article supplement (PMC4182453; doi:10.1371/journal.pone.0108362), 2014-09-30
Supplement: pone.0108362.s003.pdf [file pone.0108362.s003.pdf]

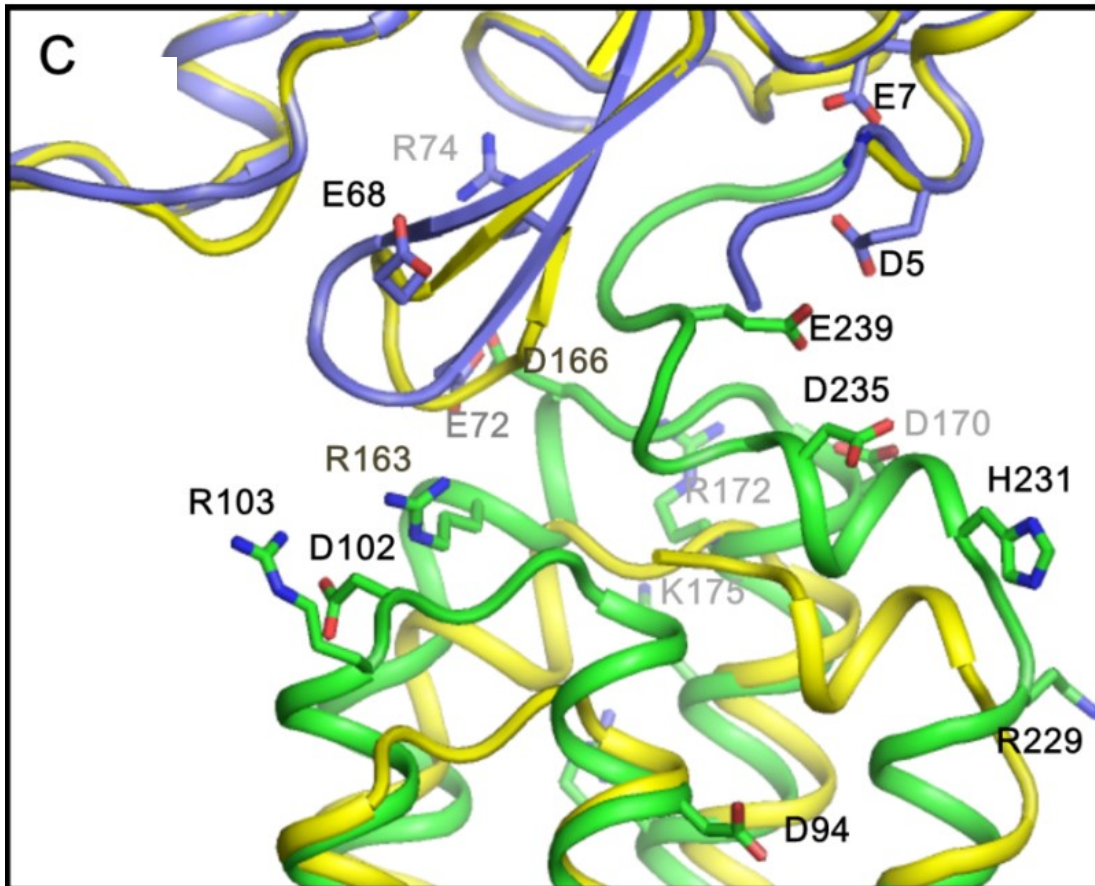

**Figure S3. pH dependence of the structure of cR3 in the cytoplasmic and extracellular surface regions.** The protein structure observed at pH 5 (green and blue) is compared with that observed at pH 6 (yellow). The inter-membrane space in the *P321* crystal expanded significantly in the post-crystallization soaking solution at pH 6.
