# Supplementary material for: Crystal Structure of Cruxrhodopsin-3 from Haloarcula vallismortis
Source: PubMed Central journal article supplement (PMC4182453; doi:10.1371/journal.pone.0108362), 2014-09-30
Supplement: pone.0108362.s005.pdf [file pone.0108362.s005.pdf]

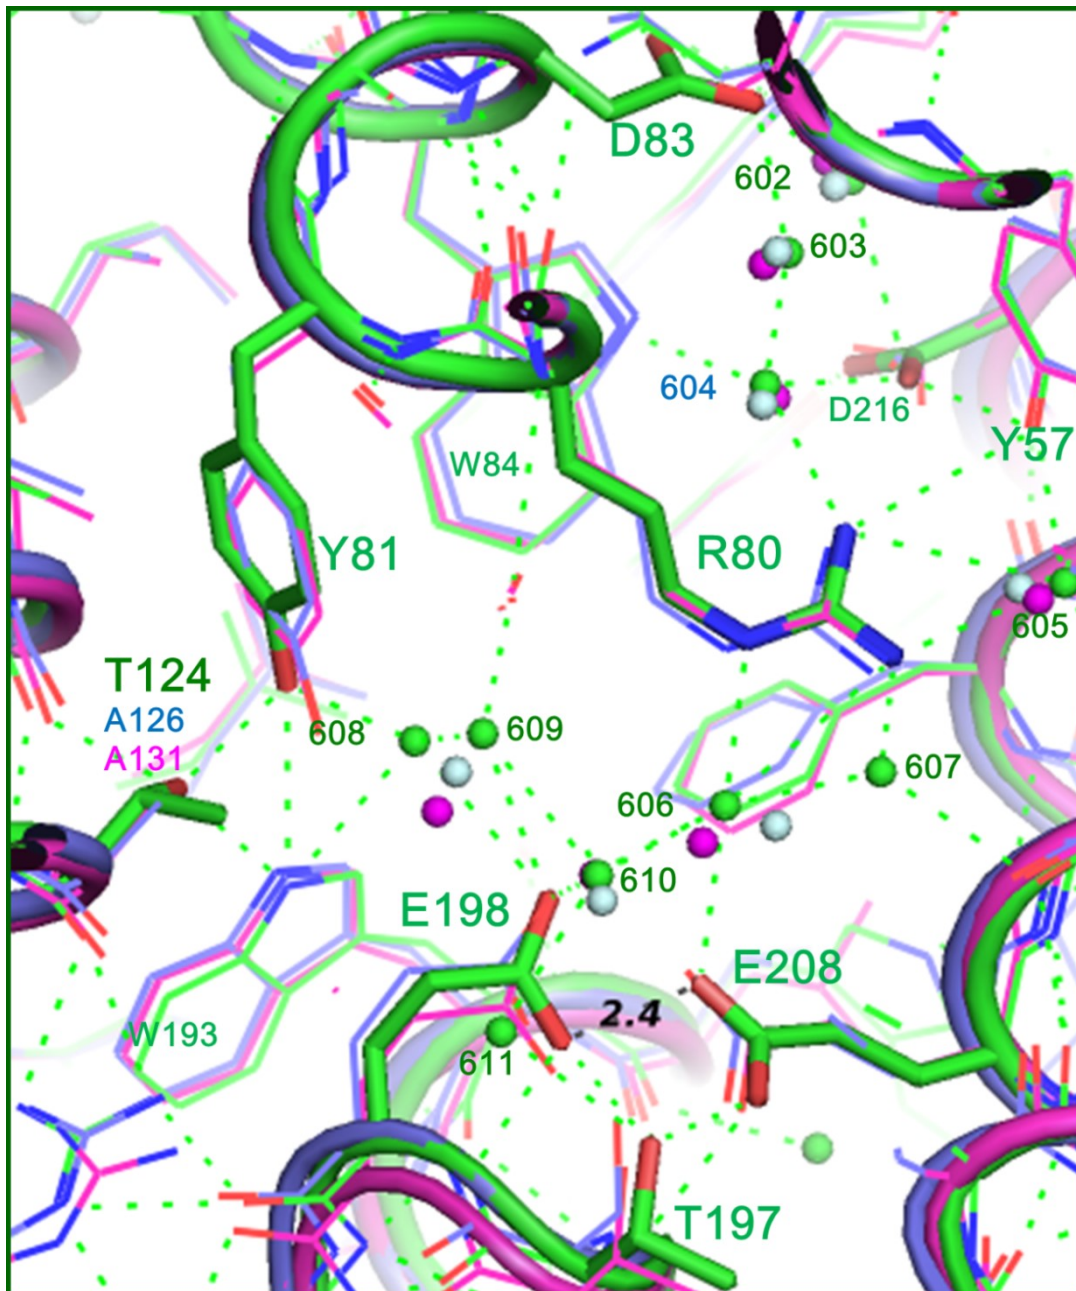

**Figure S5. The proton-release pathway in proton-pumping archaeal rhodopsins.** The structure of cR3 (green) is compared with those of bR in the *P622* crystal (white, PDB entry 1IW9) and aR2 in the *P321* crystal (magenta, PDB entry 2EI4).
