# Supplementary material for: Crystal Structure of Cruxrhodopsin-3 from Haloarcula vallismortis
Source: PubMed Central journal article supplement (PMC4182453; doi:10.1371/journal.pone.0108362), 2014-09-30
Supplement: pone.0108362.s007.pdf [file pone.0108362.s007.pdf]

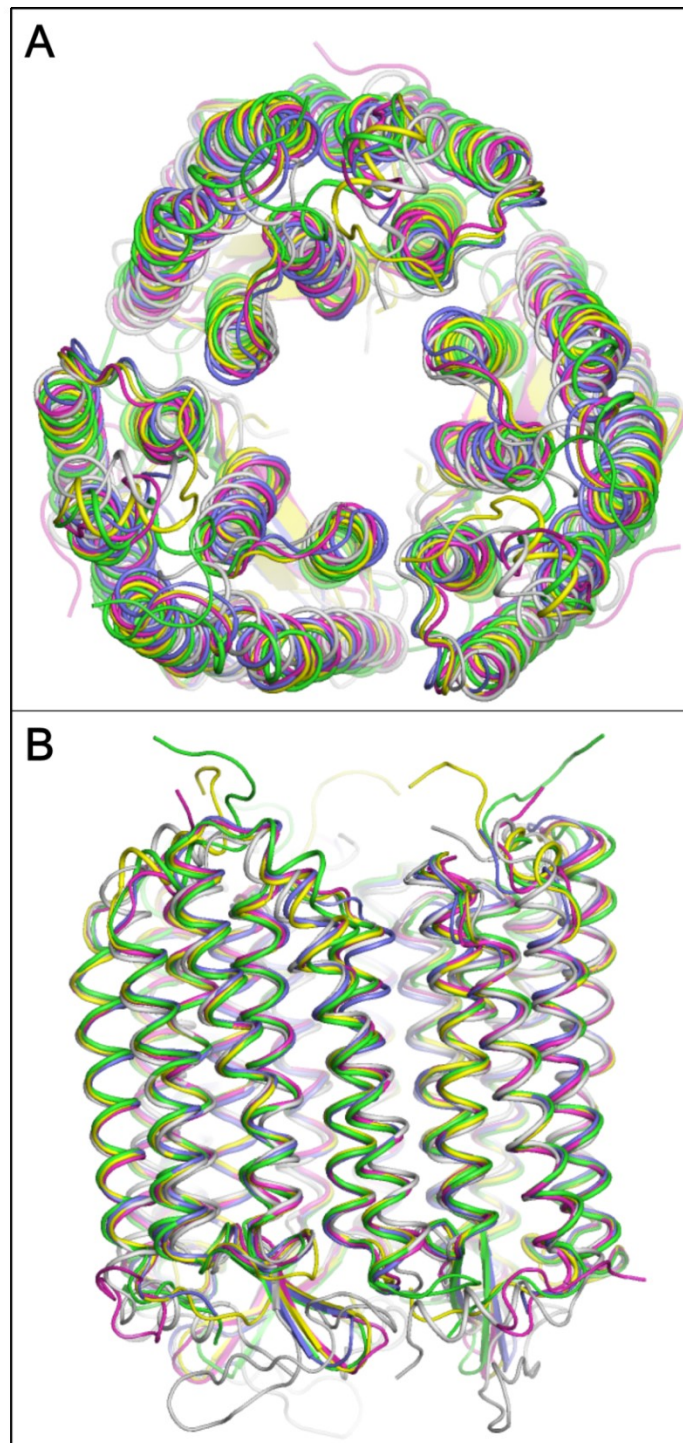

**Figure S7. Comparison of the trimeric assemblies of ion-pumping archaeal rhodopsins.** The trimeric structure of cR3 (purple, PDB entry 4L35) is compared with those of aR2 (magenta, PDB entry 2E14), bR (orange, PDB entry: 1IW6), deltarhodopsin-3 (blue, PDB entry 1FBZ) and  $\rho$ HR (gray, PDB entry 3A7K). A) View from the cytoplasmic side. B) Side view.
