# Supplementary material for: Crystal Structure of Cruxrhodopsin-3 from Haloarcula vallismortis
Source: PLOS journal article supplement (doi:10.1371/journal.pone.0108362), 2014-09-30
Supplement: S4 (10.1371/journal.pone.0108362.s004) [file journal.pone.0108362.s004]

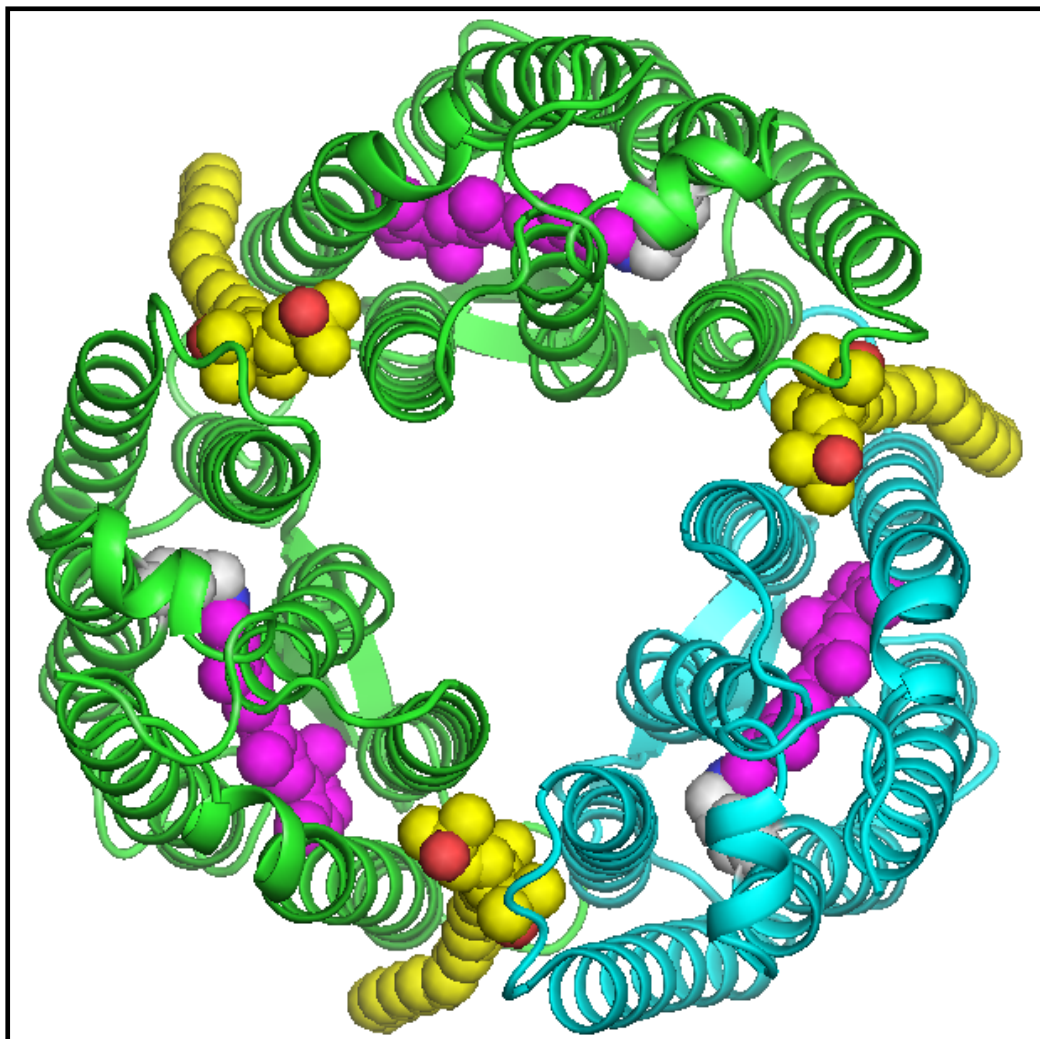

**Fig. S4. Trimeric structure of cR3 in complex with bacterioruberin.** Bacterioruberin (yellow) is bound to the inter-subunit crevice within the trimeric structure of cR3.
